# Supplementary material
Source: PubMed Central journal article supplement (PMC3864325)
Supplement: 1317632110_pnas.201317632SI.pdf [file 1317632110_pnas.201317632SI.pdf]

# Supporting Information

Thai et al. 10.1073/pnas.1317632110

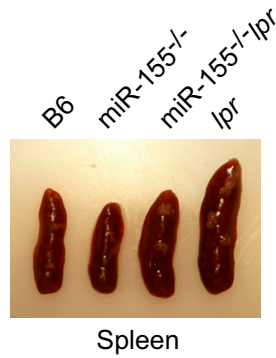

**Fig. S1.** Ablation of microRNA-155 (miR-155) alleviates splenomegaly in the *Fas<sup>lpr</sup>* mouse. Representative spleens were obtained from aged mice (10–12 mo old). WT B6 ( $n = 5$ ); miR-155<sup>-/-</sup> ( $n = 5$ ); miR-155<sup>-/-</sup>-*Fas<sup>lpr</sup>* ( $n = 10$ ); *Fas<sup>lpr</sup>* ( $n = 10$ ).

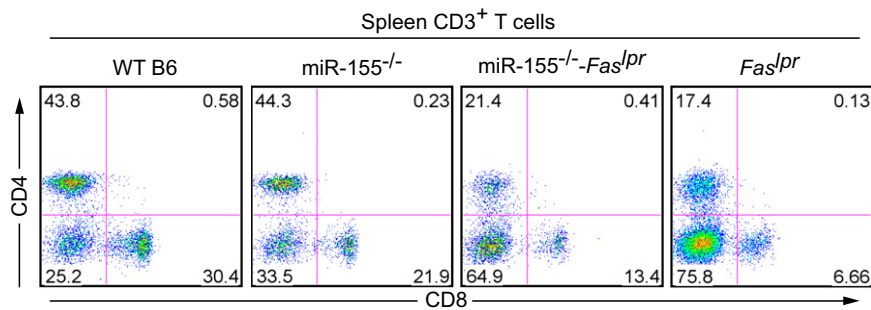

**Fig. S2.** MiR-155 deficiency does not alter the frequency of peripheral CD4<sup>-</sup>CD8<sup>-</sup> T cells in *Fas<sup>lpr</sup>* mice. The frequency of CD4<sup>-</sup>CD8<sup>-</sup> T cells within the CD3 gate was determined by FACS analysis from spleens of 10- to 12-mo-old mice. Plots are representative of 5–10 experiments. B6 ( $n = 5$ ); miR-155<sup>-/-</sup> ( $n = 5$ ); miR-155<sup>-/-</sup>-*Fas<sup>lpr</sup>* ( $n = 10$ ); *Fas<sup>lpr</sup>* ( $n = 10$ ).

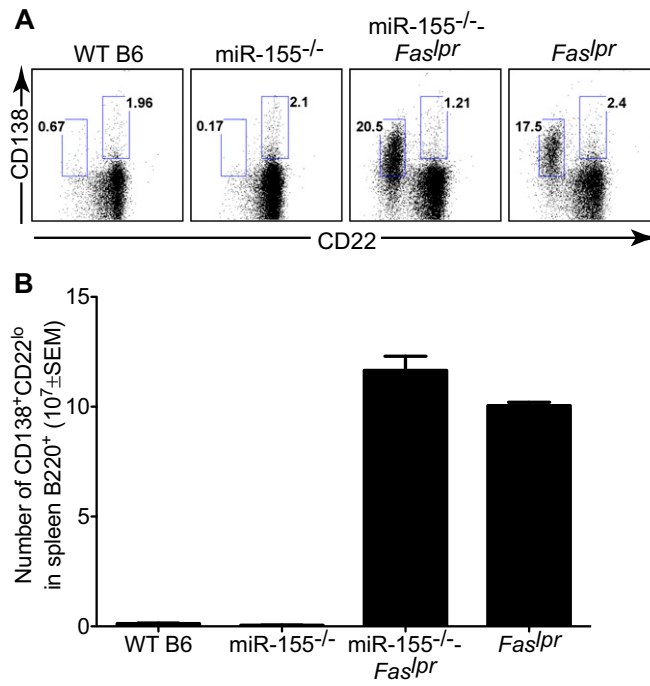

**Fig. S3.** Spleen B220<sup>+</sup>CD138<sup>+</sup>CD22<sup>lo</sup> short-lived plasmablasts remained unchanged in miR-155<sup>-/-</sup>Fas<sup>Lpr</sup> mice. (A) Spleen B220<sup>+</sup>CD138<sup>+</sup>CD22<sup>lo</sup> short-lived plasmablasts were identified by FACS. B6 (*n* = 5); miR-155<sup>-/-</sup> (*n* = 5); miR-155<sup>-/-</sup>Fas<sup>Lpr</sup> (*n* = 5); Fas<sup>Lpr</sup> (*n* = 10). (B) The number of spleen B220<sup>+</sup>CD138<sup>+</sup>CD22<sup>lo</sup> plasmablasts was calculated within the lymphoid and B220 gates. *P* values were determined by Student *t* test (GraphPad Software).

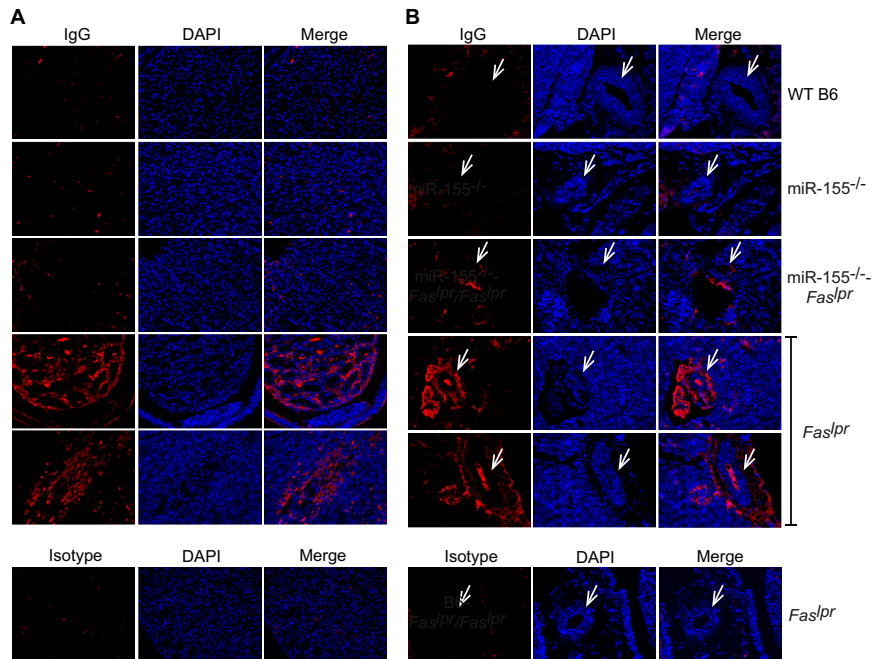

**Fig. S4.** MiR-155 deficiency alleviates renal pathologies in fas-deficient lupus-prone mice. Kidneys were obtained from 10- to 12-mo-old mice. Immunofluorescence staining was done to determine IgG (red) deposition on kidney medullas (A) and blood vessels (arrows, B). Nuclei were identified by DAPI (blue) staining.

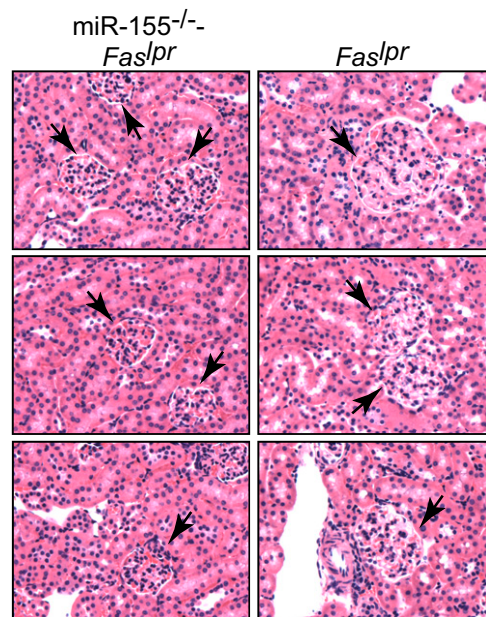

**Fig. 55.** MiR-155 deficiency restores renal architecture in *Fas*-deficient lupus-prone mice. Kidneys were obtained from 10- to 12-mo-old mice. Kidney morphology was assessed by histology with H&E stain. Arrows indicate glomeruli.

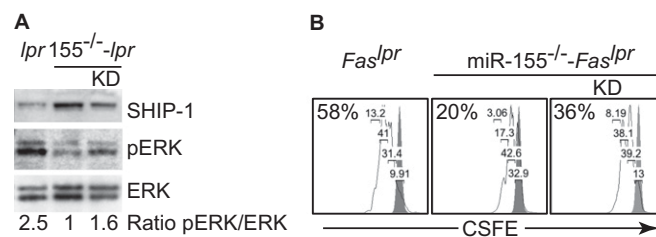

**Fig. 56.** In vitro knock-down (KD) of mouse *Inpp5d* partially restored ERK phosphorylation and proliferation in *miR-155<sup>-/-</sup>-Fas<sup>lpr</sup>* B cells. (A) SHIP-1, pERK, and total ERK protein levels were detected by Western blots in *miR-155<sup>-/-</sup>-Fas<sup>lpr</sup>* spleen B cells stimulated with intact anti-IgM (B-cell receptor, BCR). Ratio: pERK/total ERK was determined by Bio-Rad Quantity One software. Knock-down was done using the GIPZ *Inpp5d* Lentiviral shRNA Transduction Starter Kit according to the manufacturer's protocol (Thermo Scientific). The shRNA sequences were AATCCTGGATGGCTTTTCAG and TAATGCTGATCAGGATATG. (B) Cell division was determined for knock-down B-cell cultures as in Fig. 6 using FlowJo Proliferation Platform software. Results are representative of two independent experiments;  $n = 4$  mice.

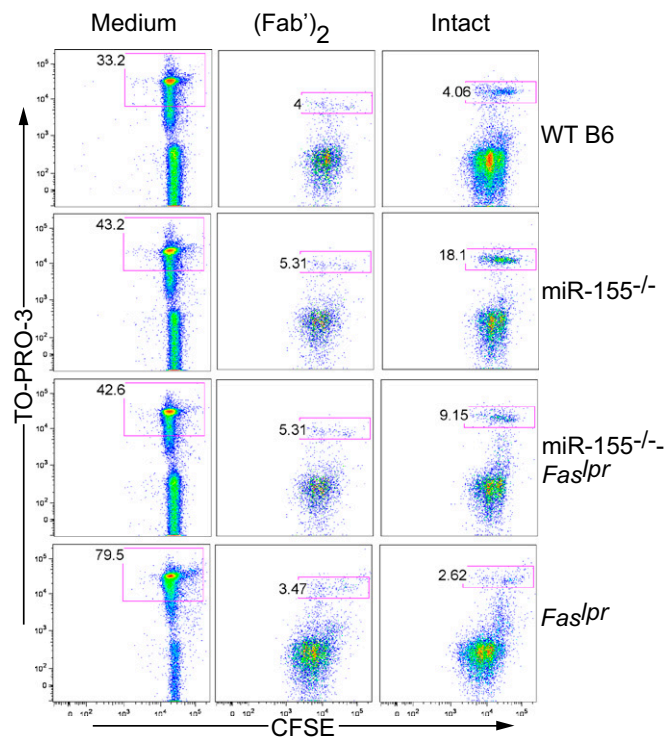

**Fig. S7.** MiR-155 deficiency leads to increased cell death after BCR and FcγRIIB coligation. Naïve spleen B cells were purified by negative selection using CD43 MACS beads, followed by carboxyfluorescein succinimidyl ester (CFSE) labeling. Labeled cells were stimulated with either intact IgG or F(ab')<sub>2</sub> anti-IgM for 3 d. FACS analysis was used to determine CFSE dilution as a function of cell division. Dead cells were detected by the DNA vital dye TO-PRO-3.

**Table S1. Urinalysis to determine renal functions**

| Variable                                                   | Leukocyte | Protein (mg/mL ± SD)  | Blood          |
|------------------------------------------------------------|-----------|-----------------------|----------------|
| C57BL/6 ( <i>n</i> = 5)                                    | ND        | 6 ± 13*               | ND-trace       |
| MiR-155 <sup>-/-</sup> ( <i>n</i> = 5)                     | ND        | 0                     | ND             |
| MiR-155 <sup>-/-</sup> -Fas <sup>Lpr</sup> ( <i>n</i> = 6) | ND        | 53 ± 36* <sup>†</sup> | ND-trace       |
| Fas <sup>Lpr</sup> ( <i>n</i> = 5)                         | Trace-few | 260 ± 89 <sup>†</sup> | Trace-moderate |

The presence of leukocyte, proteins, and blood in urine samples was determined using Multistix 10 SG strips and the CLINITEKStatus machine. ND, not detected.

\**P* = 0.0223.

<sup>†</sup>*P* = 0.0006.
